# Supplementary material for: Brevican, Neurocan, Tenascin-C and Tenascin-R Act as Important Regulators of the Interplay between Perineuronal Nets, Synaptic Integrity, Inhibitory Interneurons and Otx2
Source: bioRxiv or medRxiv preprint supplement (doi:10.1101/2022.02.24.481837), 2022-02-26
Supplement: Supplementary file [file media-1.pdf]

## 1 16 Supplementary FIGURE LEGENDS

2 **Supplementary Figure 1:** Diminished PNN organization in the retrosplenial-, secondary visual- and  
3 auditory cortex of quadruple knockout mice. **(A-F)** Immunohistochemical staining of PNNs in murine  
4 coronal brain slices with WFA (green) and anti-aggrecan (red). Images of WFA-positive and aggrecan-  
5 positive PNN-enwrapped neurons were taken and counted in the retrosplenial-, secondary visual- and  
6 auditory cortex. **(G)** A significantly reduced number of WFA-positive cells in the retrosplenial-,  
7 secondary visual- and auditory cortex of quadruple knockout mice could be noticed ( $p < 0.001$ ,  $N = 7$ ).  
8 **(H)** Also, the number of aggrecan-positive cells was significantly reduced in retrosplenial-, secondary  
9 visual- and auditory cortex of quadruple Knockout mice ( $p < 0.001$ ,  $N = 7$ ). **(I, J)** The number of WFA-  
10 positive and aggrecan-positive processes per PNN were counted in retrosplenial-, secondary visual-,  
11 primary visual- and auditory cortex. Both, WFA-positive and aggrecan-positive processes were  
12 significantly reduced in the examined cortical areas ( $p < 0.001$ ,  $N = 7$ ); 4xKO = quadruple knockout,  
13 Aud = auditory cortex, V1 = primary visual cortex, V2 = secondary visual cortex, RSC = retrosplenial  
14 cortex, WFA = Wisteria floribunda agglutinin, WT = wildtype, \*\*\* =  $p < 0.001$  data are shown as  
15 mean  $\pm$  SEM and SD, scale bar = 20  $\mu$ m.

16 **Supplementary Figure 2:** Inhibitory synaptic elements in the V1 of quadruple knockout mice. **(A)**  
17 Western blot analysis of gephyrin protein levels in the V1. **(B)** No significant differences in the  
18 gephyrin protein band intensity were detectable in visual cortex tissue of wildtype and quadruple  
19 knockout mice ( $p = 0.16$ ,  $N = 8$ ). **(C)** RT-qPCR analyses revealed a comparable *Gephn* mRNA  
20 expression in the visual cortex of wildtype and quadruple knockout mice ( $p = 0.07$ ,  $N = 6$ ). **(D)** Western  
21 blot analysis of gephyrin protein levels in the V1. **(E)** Comparable VGAT protein band intensity in  
22 visual cortex tissue of wildtype and quadruple knockout ( $p = 0.14$ ,  $N = 8$ ). **(F)** RT-qPCR analyses  
23 revealed a significant lower *Slc32a1(VGAT)* mRNA expression in the visual cortex of quadruple  
24 knockout mice ( $p < 0.001$ ,  $N = 6$ ); 4xKO = quadruple knockout, *Gephn* = *Gephyrin*, V1 = primary  
25 visual cortex, VGAT = vesicular GABA transporter, WT = wildtype, \* =  $p < 0.05$  data are shown as  
26 mean  $\pm$  SEM and SD.

27 **Supplementary Figure 3:** Excitatory synaptic elements in the V1 of quadruple knockout mice. **(A)**  
28 Western blot analysis of PSD95 protein levels in the V1. **(B)** No significant differences in the PSD95  
29 protein band intensity were detectable in visual cortex tissue of wildtype and quadruple knockout mice  
30 ( $p = 0.85$ ,  $N = 8$ ). **(C)** RT-qPCR analyses revealed a comparable *Dlg4* mRNA expression in the visual  
31 cortex of wildtype and quadruple knockout mice ( $p = 0.10$ ,  $N = 6$ ). **(D)** Western blot analysis of  
32 VGLUT1 protein levels in the V1. **(E)** Comparable VGLUT1 protein band intensity in visual cortex  
33 tissue of wildtype and quadruple knockout ( $p = 0.46$ ,  $N = 8$ ). **(F)** RT-qPCR analyses revealed  
34 comparable *Slc17a7 (VGLUT1)* mRNA expression in the visual cortex of wildtype and quadruple  
35 knockout mice ( $p = 0.40$ ,  $N = 6$ ); 4xKO = quadruple knockout, *Dlg4* = *postsynaptic density protein*  
36 *95*, PSD95 = postsynaptic density protein 95, *Slc17a7* = vesicular glutamate transporter 1, V1 =  
37 primary visual cortex, VGLUT1 = vesicular glutamate transporter 1, WT = wildtype, \* =  $p < 0.05$  data  
38 are shown as mean  $\pm$  SEM and SD.

39 **Supplementary Figure 4:** Analyses of parvalbumin-positive interneuron populations in the  
40 retrosplenial-, secondary visual- and auditory cortex of wildtype and quadruple knockout mice. **(A-F)**  
41 Representative coronal cortical brain slices of wildtype and quadruple KO double-labeled using a  
42 specific antibody against parvalbumin and WFA. **(G)** The number of parvalbumin-positive cells was  
43 comparable in the retrosplenial cortex in wildtype and quadruple knockout mice ( $p = 0.67$ ,  $N = 8$ ).  
44 Furthermore, the number of parvalbumin-positive cells was comparable in the secondary visual cortex  
45 ( $p = 0.11$ ,  $N = 8$ ) and the auditory cortex of wildtype and quadruple knockout mice ( $p = 0.61$ ,  $N = 8$ ).

46 4xKO = quadruple knockout, *Pvalb* = parvalbumin, WT = wildtype, WFA = *Wisteria floribunda*  
47 agglutinin, \* =  $p < 0.05$ , data are shown as mean  $\pm$  SEM and SD, scale bar = 200  $\mu\text{m}$ .

48 **Supplementary Figure 5:** Analyses of parvalbumin and calretinin-positive interneuron populations in  
49 the retrosplenial-, secondary visual- and auditory cortex of wildtype and quadruple knockout mice. (A-  
50 F) Representative coronal cortical brain slices of wildtype and quadruple KO double-labeled using a  
51 specific antibody against calretinin and WFA retrosplenial-, secondary visual- and auditory cortex of  
52 wildtype and quadruple knockout mice. (G) The number of calretinin-positive cells was comparable in  
53 the retrosplenial cortex between wildtype and quadruple knockout mice ( $p = 0.63$ ,  $N = 8$ ). Furthermore,  
54 the number of calretinin-positive cells was comparable in the secondary visual cortex ( $p = 0.53$ ,  $N =$   
55 8) and the auditory cortex of wildtype and quadruple knockout mice ( $p = 0.19$ ,  $N = 8$ ). 4xKO =  
56 quadruple knockout, *Pvalb* = parvalbumin, WT = wildtype, WFA = *Wisteria floribunda* agglutinin, \*  
57 =  $p < 0.05$ , data are shown as mean  $\pm$  SEM and SD, scale bar = 200  $\mu\text{m}$ .

58 17 SUPPLEMENTARY FIGURES

59 Supplementary Figure 1:

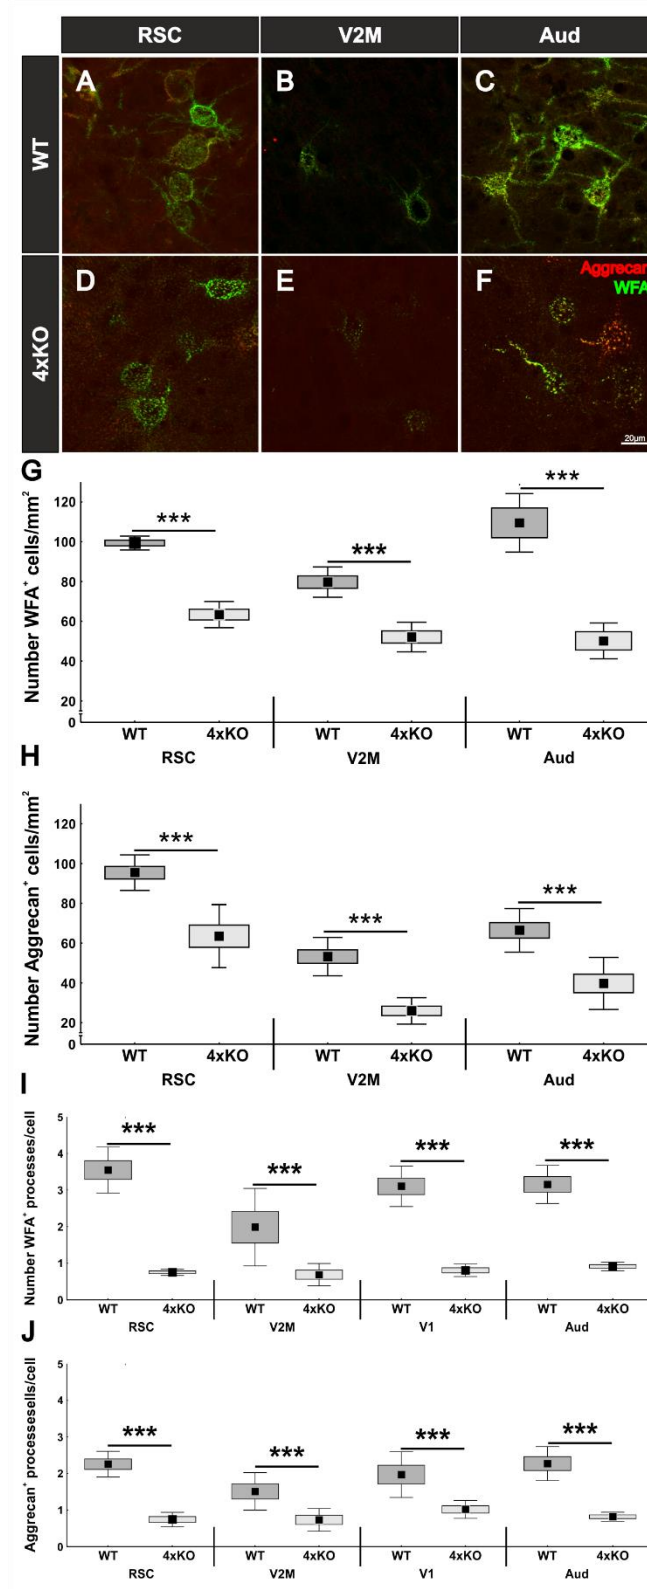

60

61 **Supplementary Figure 2:**

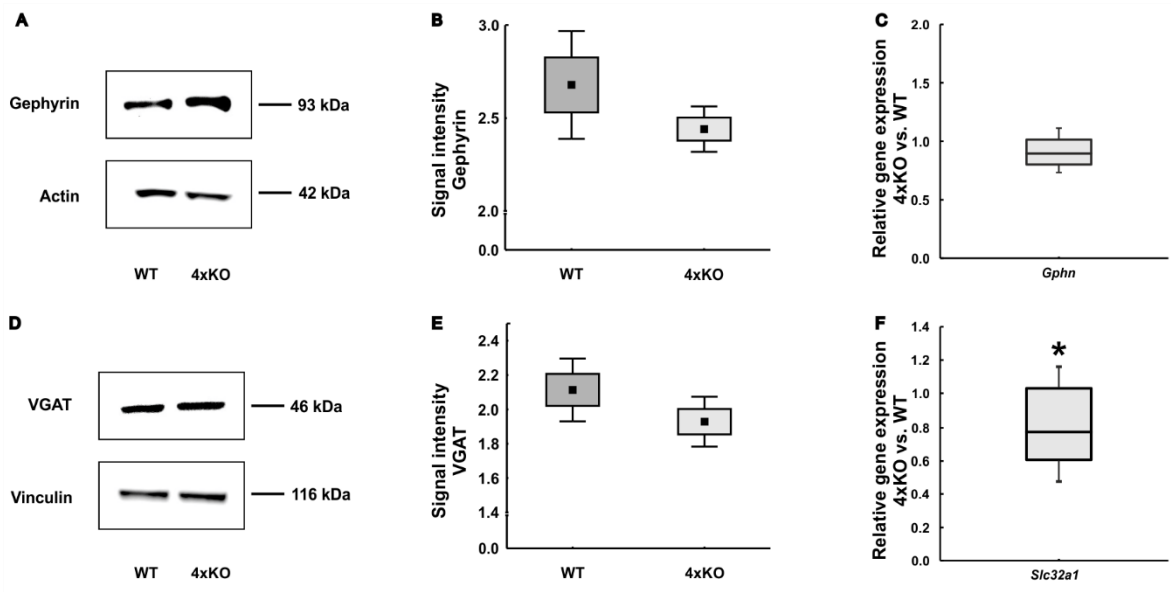

62  
63

64

65 **Supplementary Figure 3:**

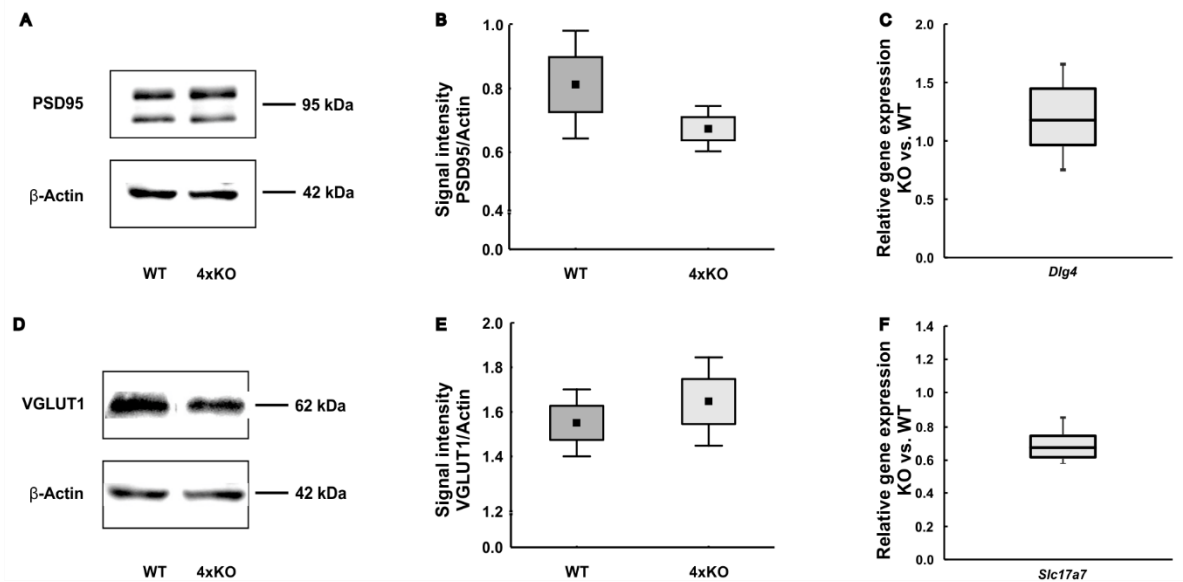

66

67

68 **Supplementary Figure 4:**

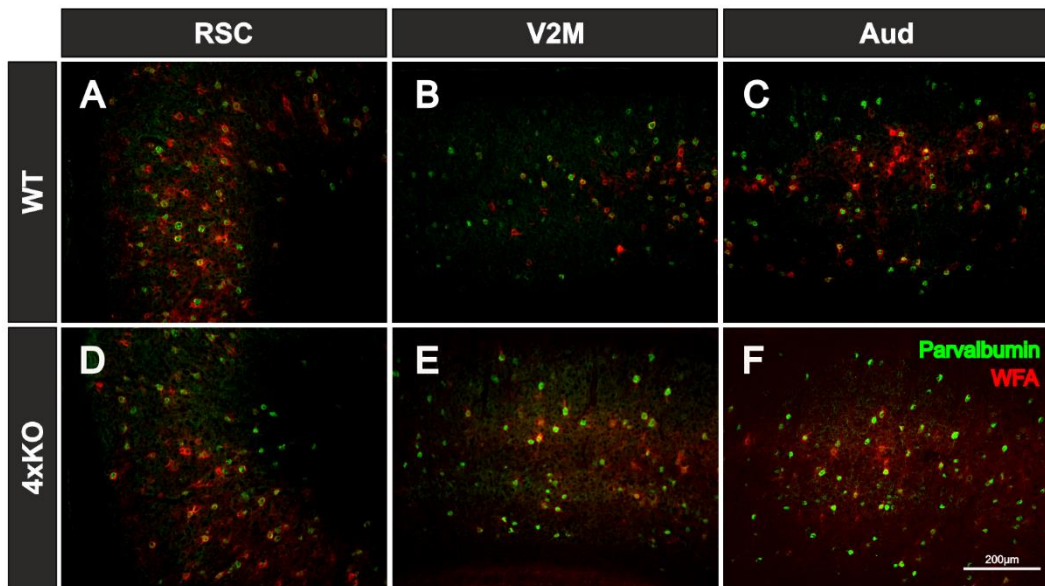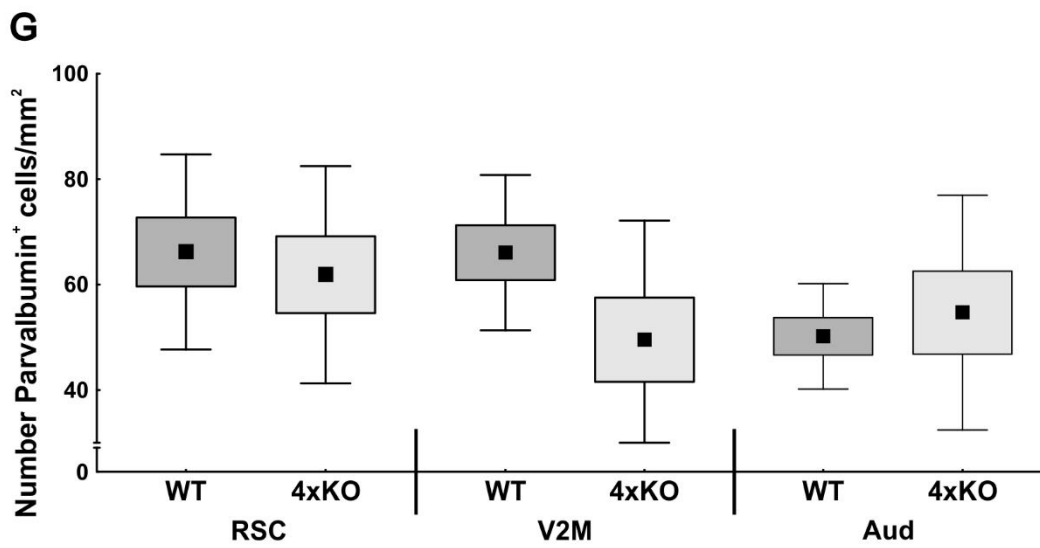

69

70

71 **Supplementary Figure 5:**

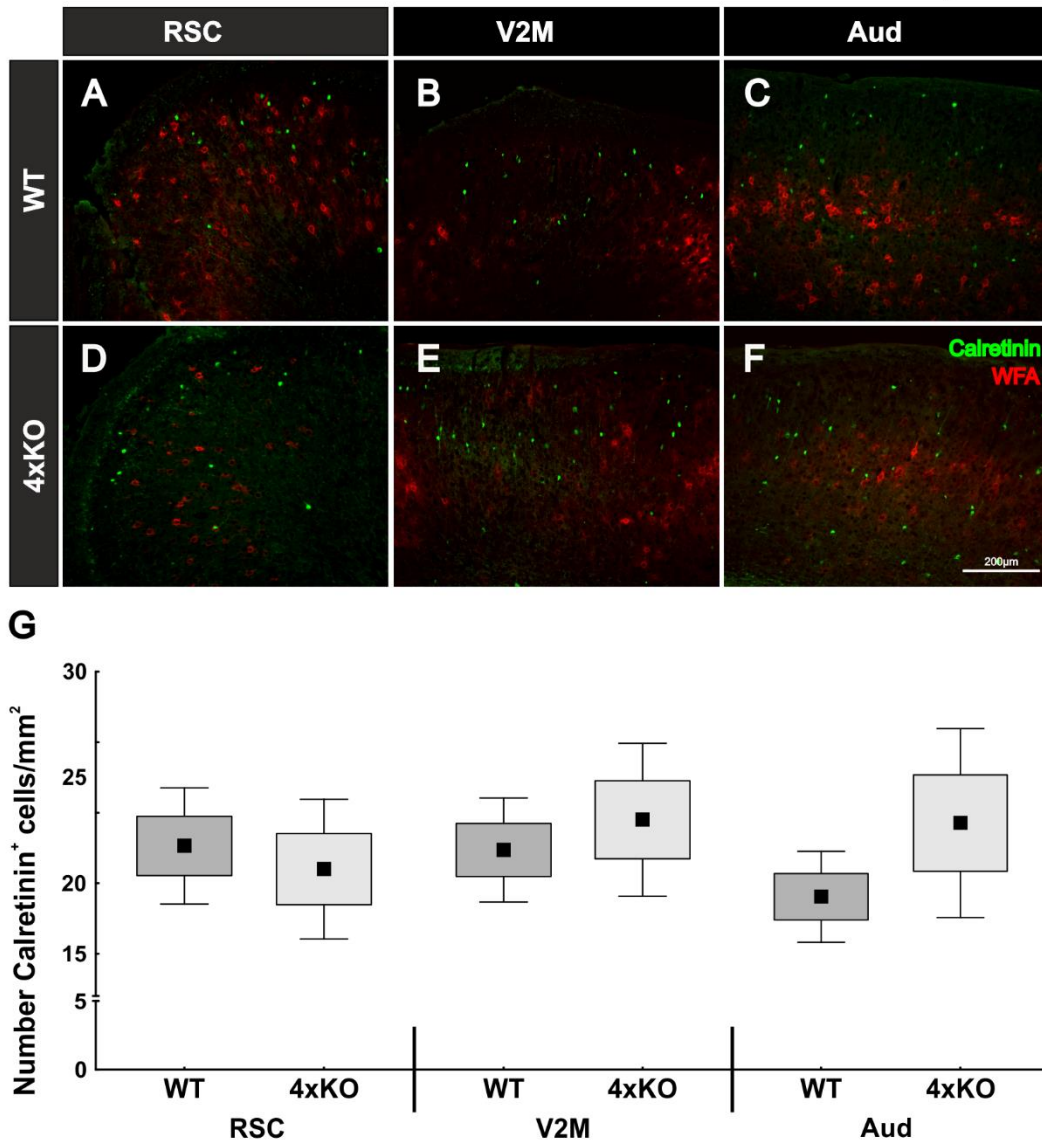

72
